# Supplementary material for: Knowledge and attitudes about HPV infection and prevention methods among medical students in Yemen: a national cross- sectional study
Source: Research Square preprint supplement (doi:10.21203/rs.3.rs-7687122/v1), 2025-10-17
Supplement: Supplementary file 1 [file a5534c7a4313947c1c067c27.docx]

**Supplementary table 1:** Cross-tabulation of cervical cancer screening practice grade by knowledge grade

| **Practice grade** | **Knowledge grade** | | |
| --- | --- | --- | --- |
|  | Poor n (%) | Fair n (%) | Adequate n (%) |
| Poor | 2426 (85.3%) | 406 (14.3%) | 14 (0.5%) |
| Adequate | 6 (40.0%) | 9 (60.0%) | — |

**Note:** Entries are presented as n (%), representing the count and row percentage. The analysis shows the relationship between participants' graded knowledge and their self-reported screening practices.

**Supplementary table 2:** Correlation Analysis of Knowledge, Attitude, and Practice (KAP) Scores and Grades

| **Analysis type** | **Variable 1** | **Variable 2** | **Coefficient** | **p-value** |
| --- | --- | --- | --- | --- |
| **Pearson correlation (Scores)** | Knowledge Score | Attitude Score | r = 0.01 | 0.565 |
| Knowledge Score | Practice Score | r = 0.06 | **0.003** |
| Attitude Score | Practice Score | r = 0.04 | 0.072 |
| **Spearman correlation (Grades)** | Knowledge Grade | Practice Grade | ρ = 0.02 | 0.418 |
| Knowledge Grade | Attitude Grade | ρ = -0.02 | 0.378 |
| Attitude Grade | Practice Grade | ρ = 0.05 | **0.015** |

Note: Pearson correlation coefficient (r) was used for continuous scores, while Spearman's rank correlation coefficient (ρ) was used for ordinal grades. Statistically significant p-values (p < 0.05) are bolded.

**Supplementary table 3:** Multivariable logistic regression analysis of predictors for adequate knowledge

| **Predictor variable** | **Category** | **Odds Ratio (OR)** | **p-value** |
| --- | --- | --- | --- |
| **Age** | (Continuous) | 1.0 | **0.016** |
| **Education Level** | (Reference: University Degree) |  |  |
| Non-literate | 2.99 x 10⁷ | 0.997 |
| Preparatory school certificate | 1.09 x 10⁷ | 0.997 |
| Primary school certificate | 8.54 x 10⁶ | 0.996 |
| Read and write | 1.24 | 1.000 |

**Note:** The extremely large Odds Ratios and high p-values for the education variable suggest the presence of a statistical anomaly known as quasi-complete separation, which can occur when an outcome (i.e., "Adequate Knowledge") is very rare in the sample. Therefore, these OR estimates should be interpreted with significant caution.
